# Supplementary material
Source: publisher figshare collection journal article supplement (https://acs.figshare.com/ndownloader/files/8236538)
Supplement: Supplementary file 1 [file 8236538]

## Supporting Information

# Structural Order: the Dominant Factor for Non-Geminate Recombination in Organic Photovoltaic Devices

*Liang Xu, Jian Wang, and Julia W. P. Hsu\**

Department of Materials Science and Engineering, The University of Texas at Dallas, 800 W. Campbell Rd., Richardson, TX, 75080, USA

### AUTHOR INFORMATION

#### Corresponding Author

\* E-mail: [jwhsu@utdallas.edu](mailto:jwhsu@utdallas.edu)

**Table S1.** Device parameters for the different polymer OPV devices as well as the P3HT devices with different P3HT concentrations and annealing temperatures. More than 4 devices for each condition were averaged in  $J$ - $V$  results to calculate standard deviation. The reaction order ( $\lambda$ ) was determined from the power law dependence between  $\tau$  and  $n$  ( $\tau = \tau_0 n^{-\lambda}$ , Fig. S4), the relative interfacial area ([D-A]) was extracted from low-energy EQE measurements (Fig. 3(c)), the

geometric capacitance ( $C_g$ ) was obtain from the impedance spectroscopy measurements performed in dark at 0V bias, and the hole mobility ( $\mu_h$ ) and field-dependent parameter ( $\gamma$ ) were determined using the space-charge limited current-voltage (SCLC) model (Fig. 3(d))

| Polymer           | $V_{oc}$<br>[mV] | $J_{sc}$<br>[mA/cm <sup>2</sup> ] | FF          | PCE<br>[%]  | $\lambda$ | [D-A]  | $C_g$ [nF] | $\mu_h$<br>[cm <sup>2</sup> V <sup>-1</sup> s <sup>-1</sup> ] | $\gamma$<br>[cm <sup>0.5</sup> V <sup>-0.5</sup> ] |
|-------------------|------------------|-----------------------------------|-------------|-------------|-----------|--------|------------|---------------------------------------------------------------|----------------------------------------------------|
| P3HT <sup>a</sup> | 602 ± 4          | 7.80 ± 0.07                       | 0.64 ± 0.01 | 2.99 ± 0.03 | 1.49      | 5.0E-3 | 4.5        | 1.4E-4                                                        | /                                                  |
| PBDT-TPD          | 915 ± 6          | 8.45 ± 0.19                       | 0.62 ± 0.01 | 4.78 ± 0.17 | 2.31      | /      | 5.0        | /                                                             | /                                                  |
| PCDTBT            | 903 ± 5          | 9.69 ± 0.09                       | 0.63 ± 0.02 | 5.49 ± 0.07 | 2.27      | /      | 5.6        | /                                                             | /                                                  |
| P3HT <sup>b</sup> | 650 ± 1          | 5.96 ± 0.09                       | 0.61 ± 0.01 | 2.37 ± 0.03 | 2.13      | 8.3E-3 | 4.2        | 3.2E-4                                                        | 3.7E-4                                             |
| P3HT <sup>c</sup> | 890 ± 1          | 4.91 ± 0.10                       | 0.44 ± 0.01 | 1.92 ± 0.04 | 3.37      | 2.6E-3 | 5.1        | 2.6E-5                                                        | 3.1E-3                                             |

<sup>a</sup> P3HT:PC<sub>71</sub>BM with 1:1 ratio annealed at 170 °C, Device A

<sup>b</sup> P3HT:PC<sub>71</sub>BM with 1:1 ratio annealed at 70 °C, Device B

<sup>c</sup> P3HT:PC<sub>71</sub>BM with 1:4 ratio annealed at 70 °C, Device C

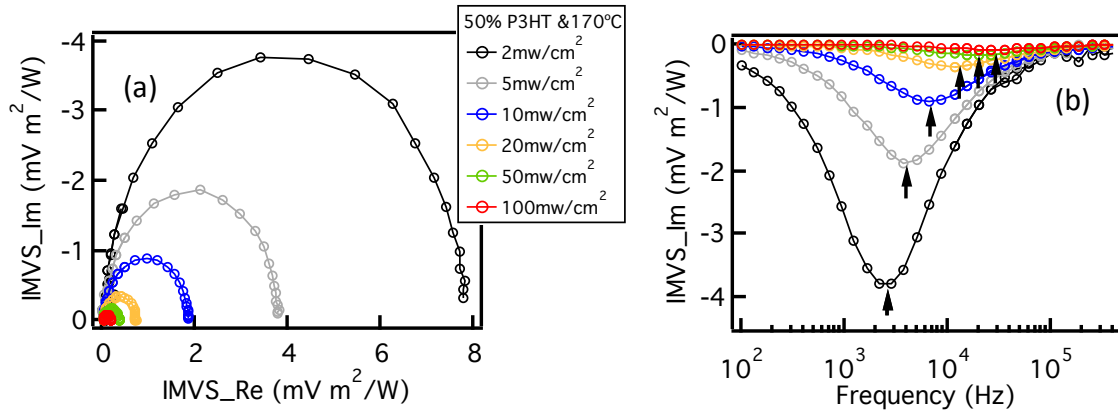

**Figure S1.** (a) Typical IMVS response in the complex plane for the 50% P3HT device annealed at 170 °C under different illumination intensities: 2 mW/cm<sup>2</sup> (black), 5 mW/cm<sup>2</sup> (grey), 10 mW/cm<sup>2</sup> (blue), 20 mW/cm<sup>2</sup> (orange), 50 mW/cm<sup>2</sup> (green), and 100 mW/cm<sup>2</sup> (red). (b) IMVS imaginary component vs. frequency for the same device. The carrier non-geminate recombination (NRG) time constant ( $\tau$ ) is calculated from  $\tau = 1/2\pi f_m$ , where  $f_m$  is the

characteristic frequency minimum of the IMVS imaginary component, as indicated by the arrows in (b).<sup>1</sup>

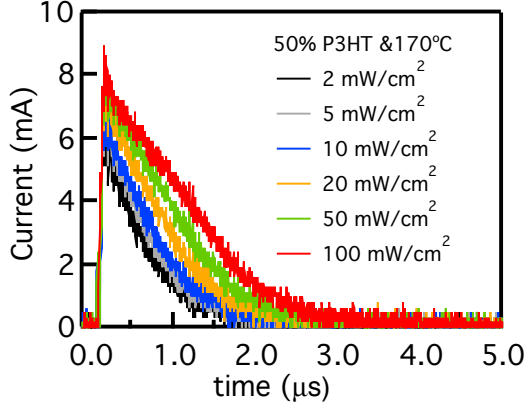

**Figure S2.** The current transient collected in the charge extraction (CE) experiments for the 50% P3HT and 170 °C annealed device (Device A) under different illumination intensities. To get the carrier density, each curve is integrated and then the charge accumulated at the electrodes, i.e.,  $C_g \times V_{oc}$ , is subtracted. All colors used here are the same as in Figure S1.

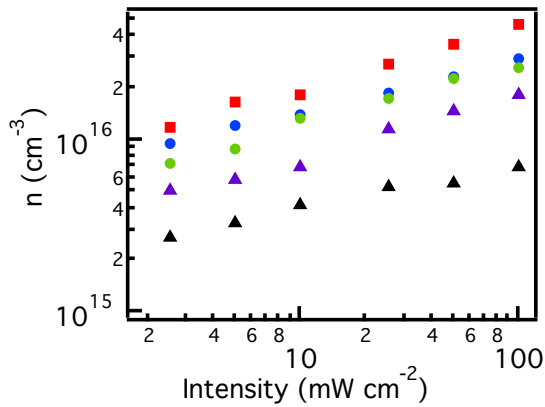

**Figure S3.** The carrier density at open circuit ( $n$ ) obtained from the CE measurements vs. illumination intensity for all the devices studied. All colors and symbols used here are the same as in Figure 2.

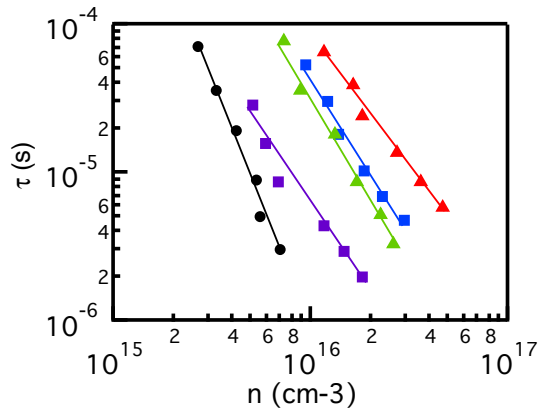

**Figure S4.**  $\tau$  vs.  $n$  measured at open circuit condition under different illumination intensities for all the devices studied. Solid lines are fitted results with the slope of  $-\lambda$ .  $\lambda$  is the reaction order which provides information on how the carrier density affects recombination behavior.<sup>2-4</sup>  $\lambda > 1$  (Table S1) is observed in all devices investigated, indicating highly carrier-density dependent recombination ( $\lambda = 1$  represents bimolecular recombination with a constant recombination coefficient).<sup>4,5</sup> Moreover,  $\lambda$  increases from Device A to C with the highest  $\lambda$  (3.37) found in the Device C. All colors and symbols used here are the same as in Figure 2.

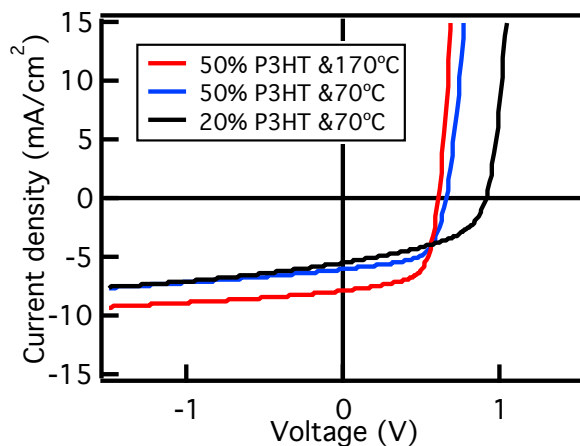

**Figure S5.**  $J$ - $V$  curves taken at AM 1.5G 100 mW/cm<sup>2</sup> illumination condition of the P3HT:PC<sub>71</sub>BM model system. All colors used here are the same as in Figure 2.

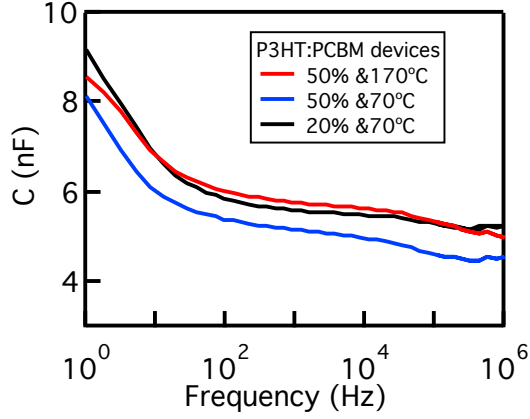

**Figure S6.**  $C$  vs.  $f$  in the dark at zero bias for the devices with different P3HT concentrations and annealing temperatures. All colors used here are the same as in Figure 2.

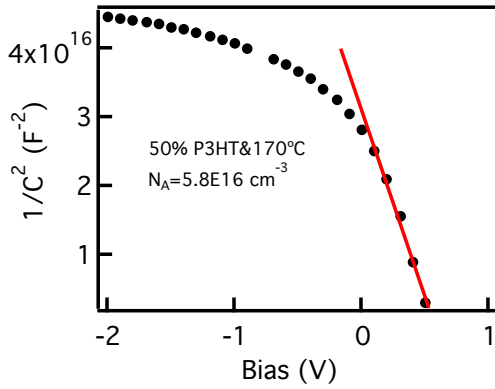

**Figure S7.** (a) Mott-Schottky curve showing the  $1/C^2$  (measured at 10 kHz) vs.  $V$  for the 50% P3HT and 170 °C annealed device (70 nm). Lines represent the fitting according to the Mott-Schottky analysis, from which the upper limit of  $N_A$  is obtained to be  $5.8 \times 10^{16} \text{ cm}^{-3}$ .<sup>6</sup>

## REFERENCES

- (1) Zhu, K.; Neale, N. R.; Miedaner, A.; Frank, A. J. Enhanced Charge-Collection Efficiencies and Light Scattering in Dye-Sensitized Solar Cells Using Oriented TiO<sub>2</sub>Nanotubes Arrays. *Nano Lett.* **2007**, 7, 69–74.
- (2) Kirchartz, T.; Nelson, J. Meaning of Reaction Orders in Polymer:Fullerene Solar Cells. *Phys. Rev. B* **2012**, 86, 165201.
- (3) Spoltore, D.; Oosterbaan, W. D.; Khelifi, S.; Clifford, J. N.; Viterisi, A.; Palomares, E.; Burgelman, M.; Lutsen, L.; Vanderzande, D.; Manca, J. Effect of Polymer Crystallinity in P3HT:PCBM Solar Cells on Band Gap Trap States and Apparent Recombination Order. *Adv. Energy Mater.* **2013**, 3, 466–471.
- (4) Shuttle, C. G.; O'Regan, B.; Ballantyne, A. M.; Nelson, J.; Bradley, D. D. C.; de Mello, J.; Durrant, J. R. Experimental Determination of the Rate Law for Charge Carrier Decay in a Polythiophene: Fullerene Solar Cell. *Appl. Phys. Lett.* **2008**, 92, 093311.
- (5) Maurano, A.; Hamilton, R.; Shuttle, C. G.; Ballantyne, A. M.; Nelson, J.; O'Regan, B.; Zhang, W.; McCulloch, I.; Azimi, H.; Morana, M.; *et al.* Recombination Dynamics as a Key Determinant of Open Circuit Voltage in Organic Bulk Heterojunction Solar Cells: a Comparison of Four Different Donor Polymers. *Adv. Mater.* **2010**, 22, 4987–4992.
- (6) Kirchartz, T.; Gong, W.; Hawks, S. A.; Agostinelli, T.; MacKenzie, R. C. I.; Yang, Y.; Nelson, J. Sensitivity of the Mott–Schottky Analysis in Organic Solar Cells. *J. Phys. Chem. C* **2012**, 116, 7672–7680.
